# Supplementary material
Source: publisher figshare collection journal article supplement (https://acs.figshare.com/ndownloader/files/5152387)
Supplement: Supplementary file 1 [file 5152387]

## **Expanding the Scope of C–H Amination Through Catalyst Design**

### **Supplementary Material**

*(14 pages)*

Christine G. Espino, Kristin Williams Fiori, Mihyong Kim, and J. Du Bois\*

*Department of Chemistry  
Stanford University  
Stanford, CA 94305-5080*

**General.** All reagents were obtained commercially unless otherwise noted. Reactions were performed using oven-dried glassware under an atmosphere of dry nitrogen. Air- and moisture-sensitive liquids and solutions were transferred via syringe or stainless steel cannula. Organic solutions were concentrated under reduced pressure (ca. 15 mm Hg) by rotary evaporation. Freshly distilled solvents were employed unless otherwise noted. Dichloromethane and tetrahydrofuran were dried by passage under 12 psi N<sub>2</sub> through activated alumina columns. 1,2-Dichloroethane was used as received.

Preparation and oxidative cyclization of sulfamate ester substrates followed a previously published protocol.<sup>1</sup> The synthesis of 2,2,2-trichloroethylsulfamate was performed according to the literature report.<sup>2</sup> Chromatographic purification of products was accomplished using forced-flow chromatography on EM Science Geduran silica gel 60 (35–75 mm). Compounds purified by chromatography on silica gel were typically applied to the adsorbent bed in dichloromethane with a minimum amount of added methanol as needed for solubility. Thin layer chromatography was performed on EM Science silica gel 60 F<sub>254</sub> plates (250 mm). Visualization of the developed chromatogram was accomplished by fluorescence quenching and by staining with ethanolic anisaldehyde, aqueous potassium permanganate, or aqueous ceric ammonium molybdate (CAM) solution.

Nuclear magnetic resonance (NMR) spectra were acquired on a Varian Mercury spectrometer operating at 400 and 100 MHz for <sup>1</sup>H and <sup>13</sup>C, respectively, or on a Varian Inova spectrometer operating at 500 and 125 MHz for <sup>1</sup>H and <sup>13</sup>C, respectively, and are referenced internally according to residual solvent signals. Data for <sup>1</sup>H NMR are recorded as follows: chemical shift (δ, ppm), multiplicity (s, singlet; br s, broad singlet; d, doublet; br d, broad doublet; t, triplet; q, quartet; quint, quintet; sept, septet; m, multiplet), integration, coupling constant (Hz). Data for <sup>13</sup>C NMR are reported in terms of chemical shift (δ, ppm). Infrared spectra were recorded on a Thermo Nicolet IR300 spectrometer and are reported in terms of frequency of absorption. Sample preparation was done either as a thin film on a NaCl salt plate or as a KBr pellet. High-resolution mass spectra were obtained from the Vincent Coates Foundation Mass Spectrometry Laboratory at Stanford University.

## Experimental procedures and characterization data for Rh<sub>2</sub>(esp)<sub>2</sub>

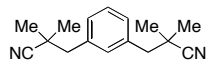

**α,α,α',α'-Tetramethyl-1,3-benzenedipropionitrile.** *n*-Butyllithium (13.4 mL of a 2.5 M solution in hexanes, 33.5 mmol, 2.5 equiv) was added slowly to a solution of *i*-Pr<sub>2</sub>NH (4.7 mL, 33.5 mmol, 2.5 equiv) in 16 mL of THF at 0 °C. The mixture was stirred for 20 min following which time isobutyronitrile (3.0 mL, 33.5 mmol, 2.5 equiv) was added dropwise via syringe. The reaction was stirred at 0 °C for 1.5 h. A solution of α,α'-dichloro-*m*-xylene (2.35 g, 13.4 mmol) in 9 mL of THF was then slowly cannulated into the reaction flask. The resulting orange, slightly turbid mixture was warmed to 23 °C and stirred for 10 h. The reaction was quenched with 50 mL of H<sub>2</sub>O and transferred to a separatory funnel with 150 mL of EtOAc. The organic layer was collected, washed with 30 mL of saturated aqueous NaCl, dried over MgSO<sub>4</sub>, and concentrated under reduced pressure. Purification of the oily residue by chromatography on silica gel (6:1 hexanes/EtOAc) yielded 2.4 g of the dinitrile product as a white solid (75%); TLC R<sub>f</sub> = 0.18 (6:1 hexanes/EtOAc): <sup>1</sup>H NMR (CDCl<sub>3</sub>, 400 MHz) δ 7.33–7.30 (m, 1H), 7.23–7.18 (m, 3H), 2.81 (s, 4H), 1.35 (s, 12H) ppm; <sup>13</sup>C NMR (CDCl<sub>3</sub>, 100 MHz) δ 135.8, 132.1, 129.1, 128.4, 124.6, 46.4, 33.5, 26.4 ppm; IR (thin film) ν 2979, 2936, 2876, 2234, 1608, 1469, 1490, 1381, 1369, 1275, 1195, 807, 714 cm<sup>-1</sup>.

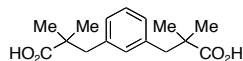

**α,α,α',α'-Tetramethyl-1,3-benzenedipropionic acid.** α,α,α',α'-Tetramethyl-1,3-benzenedipropionitrile (1.1 g, 4.58 mmol) and KOH (1.43 g, 25.4 mmol, 5.6 equiv) were combined in 6.3 mL of ethylene glycol. The flask was

equipped with a Vigreux column and the mixture was heated at 180 °C for 6 h. After cooling the reaction to 23 °C, the contents were partitioned between 12 mL of CHCl<sub>3</sub> and 12 mL of H<sub>2</sub>O. The aqueous layer was collected, acidified with 8 mL of 6 M aqueous HCl, and extracted with 1 x 90 mL of EtOAc. The organic layer was washed successively with 2 x 30 mL of H<sub>2</sub>O and 2 x 30 mL of saturated aqueous NaCl, dried over MgSO<sub>4</sub>, and concentrated under reduced pressure. Recrystallization of the isolated material from hexanes/EtOAc afforded the desired diacid as a powdery solid (850 mg, 68%): <sup>1</sup>H NMR (CDCl<sub>3</sub>, 400 MHz) δ 7.19 (t, 1H, *J* = 8.0 Hz), 7.03–7.00 (m, 3H), 2.85 (s, 4H), 1.17 (s, 12H) ppm; <sup>13</sup>C NMR (CDCl<sub>3</sub>, 100 MHz) δ 184.4, 137.3, 131.6, 128.7, 127.6, 45.9, 43.5, 24.4 ppm; IR (thin film) ν 2976, 2930, 2605, 1698, 1474, 1409, 1288, 1218, 1163, 1131, 944, 910, 734 cm<sup>-1</sup>.

**Rh<sub>2</sub>(esp)<sub>2</sub>.** A variant of a protocol described by Taber and co-workers was employed.<sup>3</sup> A 15 mL thick-walled tube was charged with Rh<sub>2</sub>(O<sub>2</sub>CCF<sub>3</sub>)<sub>4</sub> (297 mg, 0.45 mmol), α,α,α',α'-tetramethyl-1,3-benzenedipropionic acid (26 mg, 92 μmol, 0.2 equiv), and 3.0 mL of 1,2-dichloroethane. The vessel was sealed with a screw-cap and immersed in an oil bath preheated to 125 °C (Note: For proper heating, the reaction flask should be immersed so that the oil level is at the height of the solvent line). At twenty minute intervals, the flask was removed from the heating bath and the contents slowly cooled (5 min) to 23 °C. The vessel was charged with 26 mg (0.2 equiv) of the diacid and sealed, and heating at 125 °C was resumed. This process was repeated an additional three times, following which the reaction was stirred at 125 °C for 5 h. Within this period, the reaction mixture slowly becomes turbid. A second equivalent of dicarboxylic acid was then introduced in a similar fashion (5 portions of 26 mg at 20 minute intervals). Once again, the mixture was stirred at 125 °C for an additional 5 h, during which time the reaction becomes homogenous. The deep green solution was cooled to 23 °C and the contents were applied directly to a column of silica gel (150 x 40 mm of SiO<sub>2</sub>). Purification using gradient elution (15:1→10:1 hexanes/EtOAc) furnished Rh<sub>2</sub>(esp)<sub>2</sub> as a green microcrystalline product (218 mg, 64%). The first product to elute from the silica gel column using 15:1 hexanes/EtOAc is unreacted Rh<sub>2</sub>(tfa)<sub>4</sub> and the second is Rh<sub>2</sub>(esp)(tfa)<sub>2</sub>. The third-running green band constitutes the desired complex. Solid Rh<sub>2</sub>(esp)<sub>2</sub> is sparingly soluble in CH<sub>3</sub>CN. Crystals suitable for X-ray diffraction were obtained by slow evaporation of 1:1 CH<sub>2</sub>Cl<sub>2</sub>/acetone or 1:1 CH<sub>2</sub>Cl<sub>2</sub>/acetonitrile solutions of Rh<sub>2</sub>(esp)<sub>2</sub>. TLC R<sub>f</sub> = 0.43 (20:1 CH<sub>2</sub>Cl<sub>2</sub>/EtOAc); <sup>1</sup>H NMR (CD<sub>3</sub>CN, 400 MHz) δ 7.06 (t, 2H, *J* = 7.6 Hz), 6.88 (s, 2H), 6.83 (dd, 4H, *J* = 7.4, 1.6 Hz), 2.58 (s, 8H), 0.89 (s, 24H) ppm; IR (thin film) ν 3432, 1643, 1565, 1471, 1407, 1373 cm<sup>-1</sup>; HRMS (ES<sup>+</sup>) calcd for C<sub>32</sub>H<sub>40</sub>O<sub>8</sub>Rh<sub>2</sub> 758.08 found 781.0731 (MNa<sup>+</sup>).

#### Experimental procedure and characterization data for urea and sulfamide reactions (Figure 4)

To a solution of substrate (0.3 mmol) in 2.0 mL of toluene were added sequentially MgO (28 mg, 0.69 mmol, 2.3 equiv), PhI(OAc)<sub>2</sub> (106 mg, 0.33 mmol, 1.1 equiv) and Rh<sub>2</sub>(esp)<sub>2</sub> (2.3 mg, 3 μmol, 0.01 equiv). The resulting green solution was stirred and heated at 40 °C until TLC indicated no further progress in the reaction (~10 h). The reaction was cooled to 23 °C, diluted with 4 mL of CH<sub>2</sub>Cl<sub>2</sub>, and filtered through a pad of Celite (30 x 20 mm). The filter cake was rinsed with 2 x 5 mL of CH<sub>2</sub>Cl<sub>2</sub> and the combined filtrates were evaporated under reduced pressure. Purification of the isolated material by chromatography on silica gel (conditions given below) afforded the desired product.

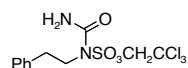

Purified by chromatography on silica gel (gradient elution: 10:1→6:1 hexanes/EtOAc) and recrystallized from hexanes/EtOAc; white solid (60%): TLC R<sub>f</sub> = 0.4 (3:1 hexanes/EtOAc); <sup>1</sup>H NMR (CDCl<sub>3</sub>, 400 MHz) δ 7.35-7.33 (m, 2H), 7.28-7.24 (1H, m), 7.22-7.19 (m, 2H), 7.02 (br s, 1H), 5.49 (br s, 1H), 4.63 (s, 2H), 4.48 (t, 2H, *J* = 6.8 Hz),

3.00 (t, 2H,  $J = 7.2$  Hz) ppm;  $^{13}\text{C}$  NMR ( $\text{CDCl}_3$ , 100 MHz)  $\delta$  160.4, 137.0, 129.1, 129.0, 127.2, 93.9, 78.7, 69.7, 35.0 ppm; IR (thin film)  $\nu$  3455, 3351, 1628, 1544, 1476, 1447, 1332, 1177, 1087, 1017, 853  $\text{cm}^{-1}$ ; HRMS ( $\text{ES}^-$ ) calcd for  $\text{C}_{11}\text{H}_{13}\text{Cl}_3\text{N}_2\text{O}_4\text{S}$  373.9662 found 372.9569 ( $\text{M}-\text{H}^+$ ).

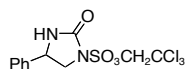

Purified by chromatography on silica gel (gradient elution: 5:1→2:1 hexanes/EtOAc); white solid (79%): TLC  $R_f$  = 0.25 (3:1 hexanes/EtOAc);  $^1\text{H}$  NMR ( $\text{CDCl}_3$ , 400 MHz)  $\delta$  7.66 (br s, 1H), 7.47-7.41 (m, 3H), 7.33-7.31 (m, 2H), 5.21 (dd, 1H,  $J = 9.2, 7.2$  Hz), 4.94 (t, 1H,  $J = 9.2$  Hz), 4.73 (d, 1H,  $J = 10.8$  Hz), 4.70 (d, 1H,  $J = 10.8$  Hz), 4.42 (dd, 1H,  $J = 8.8, 6.8$  Hz) ppm;  $^{13}\text{C}$  NMR ( $\text{CDCl}_3$ , 100 MHz)  $\delta$  163.0, 137.0, 130.0, 129.7, 126.3, 93.8, 78.7, 74.7, 58.9 ppm; IR (thin film)  $\nu$  3384, 1628, 1480, 1460, 1440, 1342, 1177, 1101, 1017, 879  $\text{cm}^{-1}$ ; HRMS ( $\text{ES}^-$ ) calcd for  $\text{C}_{11}\text{H}_{11}\text{Cl}_3\text{N}_2\text{O}_4\text{S}$  371.9505 found 370.9411 ( $\text{M}-\text{H}^+$ ).

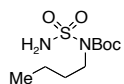

Purified by chromatography on silica gel (gradient elution: 10:1→5:1 hexanes/EtOAc) and recrystallized from hexanes/EtOAc; white solid (67%): TLC  $R_f$  = 0.21 (3:1 hexanes/EtOAc);  $^1\text{H}$  NMR ( $\text{CDCl}_3$ , 400 MHz)  $\delta$  5.29 (br s, 2H), 3.67 (t, 2H,  $J = 7.2$  Hz), 1.64-1.60 (m, 2H), 1.53 (s, 9H), 1.38-1.28 (m, 2H), 0.93 (t, 3H,  $J = 7.6$  Hz) ppm;  $^{13}\text{C}$  NMR ( $\text{CDCl}_3$ , 100 MHz)  $\delta$  152.5, 84.3, 47.5, 31.8, 28.2, 19.9, 13.8 ppm; IR (thin film)  $\nu$  3363, 3277, 2967, 2936, 2872, 1692, 1376, 1344, 1300, 1184, 1143  $\text{cm}^{-1}$ ; HRMS ( $\text{ES}^-$ ) calcd for  $\text{C}_9\text{H}_{20}\text{N}_2\text{O}_4\text{S}$  252.1144 found 251.1062 ( $\text{M}-\text{H}^+$ ).

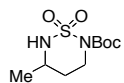

Purified by chromatography on silica gel (gradient elution: 6:1→3:1 hexanes/EtOAc); white solid (83%): TLC  $R_f$  = 0.15 (3:1 hexanes/EtOAc);  $^1\text{H}$  NMR ( $\text{CDCl}_3$ , 400 MHz)  $\delta$  4.02 (dt, 1H,  $J = 13.6, 4.4$  Hz), 3.57-3.47 (m, 1H), 3.40 (ddd, 1H,  $J = 12.0, 11.2, 3.2$  Hz), 2.54 (s, 1H), 1.76 (dq, 1H,  $J = 14.0, 3.6$  Hz), 1.48-1.31 (m, 1H), 1.36 (s, 9H), 1.11 (d, 3H,  $J = 6.4$  Hz) ppm;  $^{13}\text{C}$  NMR ( $\text{CDCl}_3$ , 100 MHz)  $\delta$  151.3, 83.3, 51.2, 45.7, 31.6, 27.5, 20.0 ppm; IR (thin film)  $\nu$  3254, 2980, 1721, 1427, 1301, 1257, 1152, 798  $\text{cm}^{-1}$ ; HRMS ( $\text{ES}^-$ ) calcd for  $\text{C}_9\text{H}_{18}\text{N}_2\text{O}_4\text{S}$  250.0987 found 249.0897 ( $\text{M}-\text{H}^+$ ).

## Experimental procedure and characterization data for intermolecular C–H amination reactions (Figure 5)

A flask containing 2,2,2-trichloroethylsulfamate (137 mg, 0.60 mmol) in 1.2 mL of  $\text{C}_6\text{H}_6$  was charged with catalyst (12  $\mu\text{mol}$  of either  $\text{Rh}_2(\text{O}_2\text{C}^t\text{Bu})_4$  or  $\text{Rh}_2(\text{esp})_2$ ) and substrate (1.0, 2.0, or 5.0 equiv). To this bright green mixture was added seven portions of  $\text{PhI}(\text{OAc})_2$  (290 mg, 0.90 mmol, 1.5 equiv) every ten minutes over the course of 1 h (7 portions of ~41 mg). During the addition of  $\text{PhI}(\text{OAc})_2$ , a change in the reaction color to brown or red was generally observed. Following the transfer of oxidant, the contents were stirred at 23  $^\circ\text{C}$  until TLC indicated the complete consumption of starting material or no further progress in the reaction (1–8 h). All volatiles were then removed under reduced pressure and the isolated material was purified by chromatography on silica gel (conditions given below) to afford the desired product.

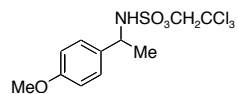

Purified by column chromatography on silica gel (9:1 hexanes/EtOAc); pale yellow oil: TLC  $R_f$  = 0.35 (4:1 hexanes/EtOAc);  $^1\text{H}$  NMR ( $\text{CDCl}_3$ , 400 MHz)  $\delta$  7.30-7.26 (m, 2H), 6.91-6.86 (m, 2H), 5.31 (br d, 1H,  $J$  = 5.2 Hz), 4.67 (quint, 1H,  $J$  = 6.9 Hz), 4.42 (d, 1H,  $J$  = 10.8 Hz), 4.38 (d, 1H,  $J$  = 10.8 Hz), 3.79 (s, 3H), 1.59 (d, 3H,  $J$  = 6.9 Hz) ppm;  $^{13}\text{C}$  NMR ( $\text{CDCl}_3$ , 100 MHz)  $\delta$  159.3, 133.5, 127.5, 114.2, 93.3, 78.0, 55.3, 54.3, 22.7 ppm; IR (thin film)  $\nu$  3299, 2978, 2360, 1613, 1586, 1515, 1306, 1283, 1249, 1178, 1124, 1014, 977, 852, 833  $\text{cm}^{-1}$ .

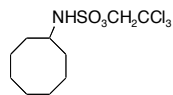

Purified by column chromatography on silica gel (gradient elution: 12:1→4:1 hexanes/EtOAc); white solid: TLC  $R_f$  = 0.49 (4:1 hexanes/EtOAc);  $^1\text{H}$  NMR ( $\text{CDCl}_3$ , 400 MHz)  $\delta$  4.62 (s, 2H), 4.54 (br d, 1H,  $J$  = 8.1 Hz), 3.74-3.65 (m, 1H), 2.04-1.96 (m, 2H), 1.74-1.64 (m, 4H), 1.63-1.48 (m, 8H) ppm;  $^{13}\text{C}$  NMR ( $\text{CDCl}_3$ , 100 MHz)  $\delta$  93.5, 78.0, 55.6, 32.4, 27.1, 25.2, 23.1 ppm; IR (thin film)  $\nu$  3306, 2925, 2857, 1447, 1360, 1181, 1090, 1059, 1009, 960, 855  $\text{cm}^{-1}$ ; HRMS ( $\text{ES}^+$ ) calcd for  $\text{C}_{10}\text{H}_{18}\text{Cl}_3\text{NO}_3\text{S}$  359.9971 found 359.9971 ( $\text{M}^+$ ).

- 
- (1) Espino, C. G.; Wehn, P. M.; Chow, J.; Du Bois, J. *J. Am. Chem. Soc.*, **2001**, *123*, 6935-6936.
  - (2) Guthikonda, K.; Du Bois, J. *J. Am. Chem. Soc.*, **2002**, *124*, 13672-13673.
  - (3) Taber, D. F.; Meagley, R. P.; Louey, J. P.; Rheingold, A. L. *Inorg. Chim. Acta*, **1995**, *239*, 25-28.

## Crystallographic Data For $\text{Rh}_2(\text{ESP})_2 \cdot (\text{acetone})_2$

### *Experimental*

#### Data Collection

A rod-shaped crystal of  $\text{C}_{38}\text{H}_{52}\text{O}_{10}\text{Rh}_2$  having approximate dimensions of 0.16 x 0.09 x 0.09 mm was mounted on a quartz fiber using Paratone N hydrocarbon oil. All measurements were made on a Siemens SMART-APEX<sup>1</sup> CCD area detector with monochromatic radiation of wavelength 0.71073 Å.

Cell constants and an orientation matrix for data collection, obtained from a least-squares refinement using the measured positions of 2000 centered reflections with  $I > 10\sigma(I)$  in the range  $2.34^\circ < \theta < 25.13^\circ$ , corresponded to a primitive triclinic cell with dimensions:

$$\begin{array}{ll} a = 9.731(4) \text{ Å} & \alpha = 66.441(6)^\circ \\ b = 9.878(4) \text{ Å} & \beta = 84.297(7)^\circ \\ c = 11.256(5) \text{ Å} & \gamma = 73.066(7)^\circ \\ V = 948.7(6) \text{ Å}^3 & \end{array}$$

For  $Z = 1$  and  $F.W. = 874.62$ , the calculated density is  $1.531 \text{ g/cm}^3$ .

Based on a statistical analysis of intensity distribution, and the successful solution and refinement of the structure, the space group was determined to be:

P-1

The data were collected at a temperature of 159 K. Frames corresponding to an arbitrary hemisphere of data were collected using  $\omega$  scans of  $0.3^\circ$  counted for a total of 10 seconds per frame.

#### Data Reduction

Data were integrated by the program SAINT<sup>2</sup> with box parameters of  $1.6 \times 1.6 \times 1.0^\circ$  to a maximum  $\theta$  value of  $26.41^\circ$ . The data were corrected for Lorentz and polarization effects. The linear absorption coefficient,  $\mu$ , for 0.71073 Å radiation is  $0.925 \text{ mm}^{-1}$ . Data were analyzed for agreement and possible absorption using SADABS<sup>3</sup>. A semi-empirical absorption correction based on 2.04 reflections with  $I > 5\sigma(I)$  was applied that resulted in normalized transmission factors ranging from 0.84 to 0.92. Of the 6182 reflections that were collected, 3767 were unique ( $R_{\text{int}} = 0.0183$ ); equivalent reflections were merged. No decay correction was deemed necessary.

#### Structure Solution and Refinement

The structure was solved by direct methods (SIR-92)<sup>4</sup> and expanded using Fourier techniques<sup>5</sup>. All non-H atoms were refined with anisotropic thermal parameters. Hydrogen atoms were located using the HFIX command (idealized positions via a riding refinement). A single torsional parameter about the H-C bond was refined in the case of methyl groups. The final cycle of full-matrix least-squares refinement<sup>6</sup> was based on 3767 reflections (all data) and 232 variable parameters and converged (largest parameter shift was 0.002 times its esd) with conventional unweighted and weighted agreement factors of:

$$R_1 = \sum ||F_o| - |F_c|| / \sum |F_o| = 0.0268 \text{ for } 3031 \text{ data with } F_o > 4\sigma(F_o)$$

$$wR_2 = [(\sum w (|F_o|^2 - |F_c|^2)^2 / \sum w |F_o|^2)^{1/2}] = 0.0567$$

The standard deviation of an observation of unit weight ( $S$ )<sup>7</sup> was 0.947. Sheldrick weights<sup>6</sup> were used; where applicable, weights were refined to convergence. The maximum and minimum peaks on the final difference Fourier map corresponded to 0.57 and -0.30 e/ $\text{\AA}^3$ , respectively.

Neutral atom scattering factors were taken from Cromer and Waber<sup>8</sup>. Anomalous dispersion effects were included in  $F_{\text{calc}}$ <sup>9</sup>; the values for  $\Delta f'$  and  $\Delta f''$  were those of Creagh and McAuley<sup>10</sup>. The values for the mass attenuation coefficients were those of Creagh and Hubbel<sup>11</sup>. All calculations were performed using the Crystal Structure<sup>12</sup> crystallographic software package.

### References

- (1) SMART: Area-Detector Software Package, Siemens Industrial Automation, Inc.: Madison, WI (1995).
- (2) SAINT: SAX Area-Detector Integration Program, V5.04; Siemens Industrial Automation, Inc.: Madison, WI, (1995)
- (3) SADABS: Siemens Area Detector ABSorption correction program, George Sheldrick, (1996). Advance copy, private communication.
- (4) SIR92: a program for automatic solution of crystal structures by direct methods. Altomare, A., Casciarano, G., Giacovazzo G., Guagliardi A., Burla M.C., Polidori, G. & Camalli, M. J. Appl. Cryst. (27), 435 (1994).
- (5) DIRDIF99: Beurskens, P.T., Admiraal, G., Beurskens, G., Bosman, W.P., de Gelder, R., Israel, R. and Smits, J.M.M. (1999). The DIRDIF-99 program system, Technical Report of the Crystallography Laboratory, University of Nijmegen, The Netherlands.
- (6) Least-Squares:  
 Function minimized:  $\sum w (|F_o|^2 - |F_c|^2)^2$   
 $w = 1 / [\sigma^2(F_o^2) + (0.0292P)^2]$  where  $P = (F_o^2 + 2F_c^2) / 3$   
 Sheldrick weights: G. M. Sheldrick (1997)
- (7) Standard deviation of an observation of unit weight:  

$$S = [\sum w (|F_o|^2 - |F_c|^2)^2 / (N_o - N_v)]^{1/2}$$
 where:  $N_o$  = number of observations  
 $N_v$  = number of variables
- (8) Cromer, D. T. & Waber, J. T.; "International Tables for X-ray Crystallography", Vol. IV, The Kynoch Press, Birmingham, England, Table 2.2 A (1974).
- (9) Ibers, J. A. & Hamilton, W. C.; Acta Crystallogr., 17, 781 (1964).
- (10) Creagh, D. C. & McAuley, W.J. ; "International Tables for Crystallography", Vol C, (A.J.C. Wilson, ed.), Kluwer Academic Publishers, Boston, Table 4.2.6.8, pages 219-222 (1992).
- (11) Creagh, D. C. & Hubbell, J.H.; "International Tables for Crystallography", Vol C, (A.J.C. Wilson, ed.), Kluwer Academic Publishers, Boston, Table 4.2.4.3, pages 200-206 (1992).
- (12) CrystalStructure 3.51: Crystal Structure Analysis Package, Rigaku and MSC (2000-3).
- (13) CRYSTALS Issue 10: Watkin, D.J.; Prout, C.K.; Carruthers, J.R.; Betteridge, P.W. Chemical Crystallography Laboratory, Oxford, UK.

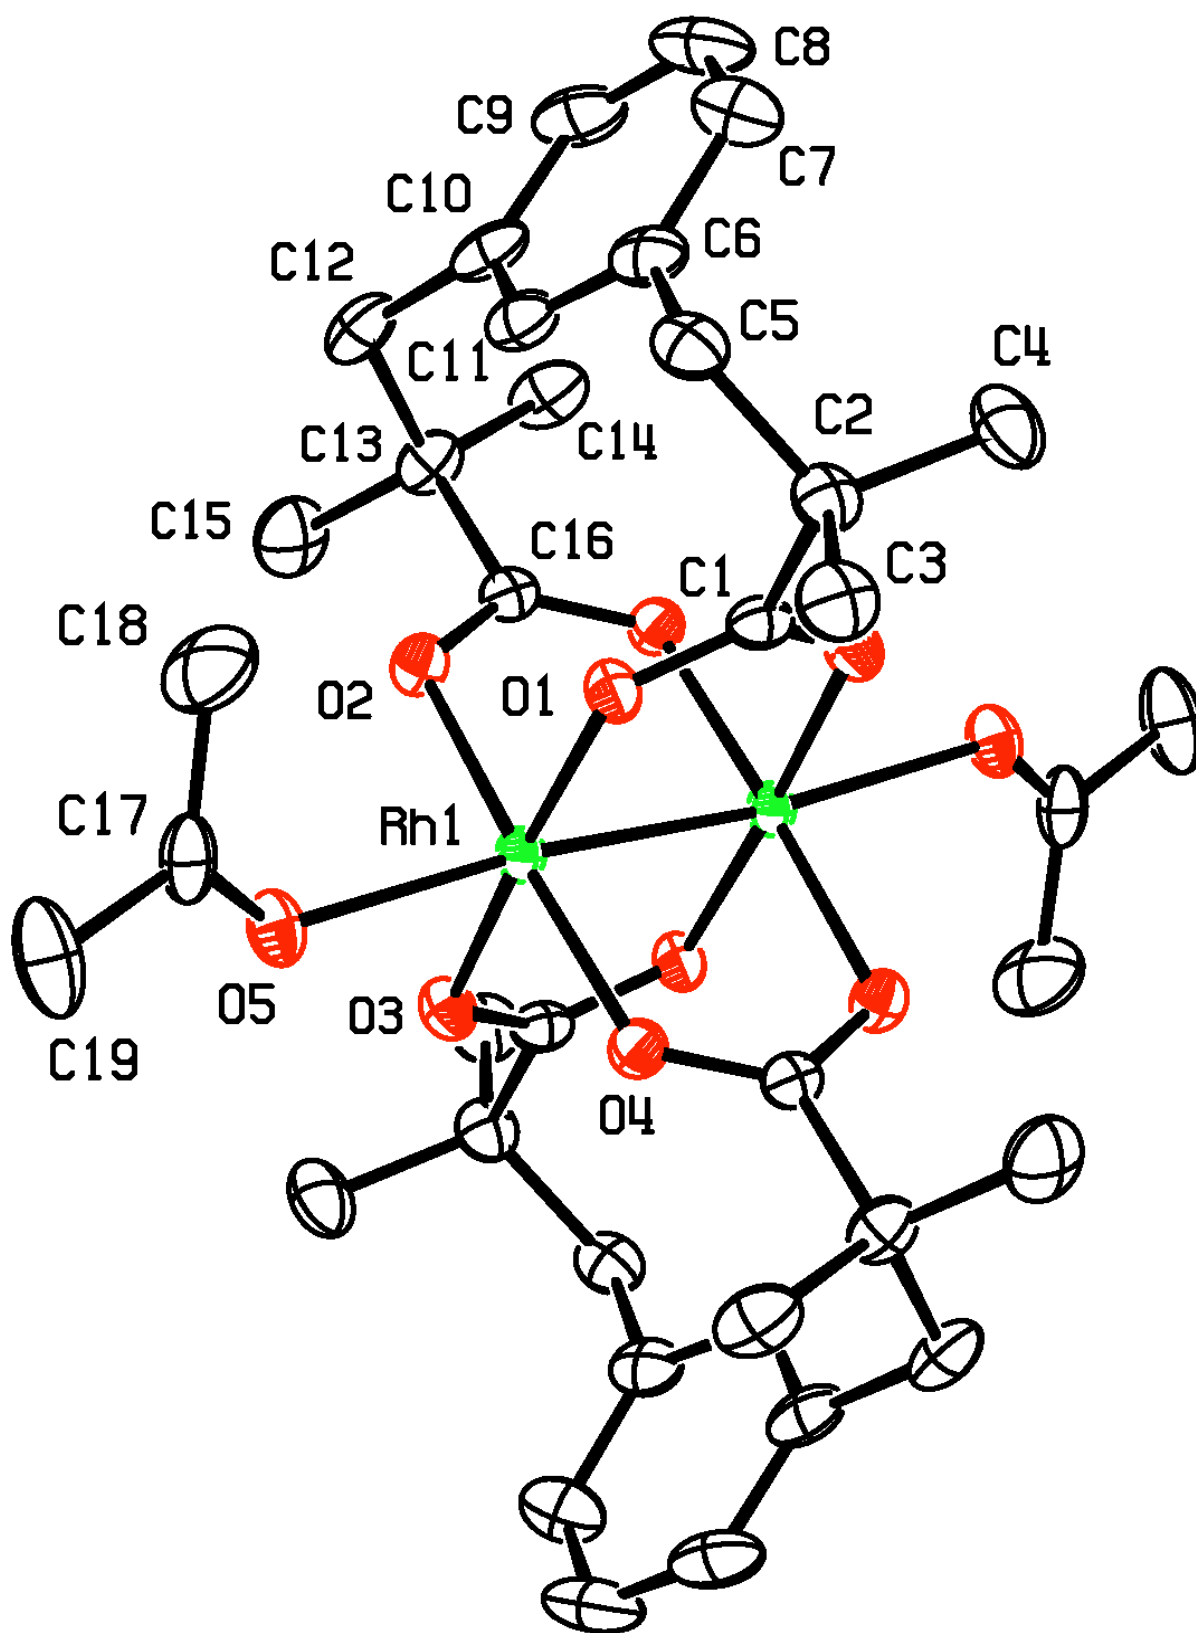



## *Experimental Details*

### A. Crystal Data

|                                      |                                                                                                                                                                                                                  |
|--------------------------------------|------------------------------------------------------------------------------------------------------------------------------------------------------------------------------------------------------------------|
| Empirical Formula                    | C <sub>38</sub> H <sub>52</sub> O <sub>10</sub> Rh <sub>2</sub>                                                                                                                                                  |
| Formula Weight                       | 874.62                                                                                                                                                                                                           |
| Crystal Color, Habit                 | unknown, rod                                                                                                                                                                                                     |
| Crystal Dimensions                   | 0.16 x 0.09 x 0.09 mm                                                                                                                                                                                            |
| Crystal System                       | triclinic                                                                                                                                                                                                        |
| Lattice Type                         | primitive                                                                                                                                                                                                        |
| Lattice Parameters                   | $a = 9.731(4) \text{ \AA}$<br>$b = 9.878(4) \text{ \AA}$<br>$c = 11.256(5) \text{ \AA}$<br>$\alpha = 66.441(6)^\circ$<br>$\beta = 84.297(7)^\circ$<br>$\gamma = 73.066(7)^\circ$<br>$V = 948.7(6) \text{ \AA}^3$ |
| Space Group                          | P-1                                                                                                                                                                                                              |
| Z value                              | 1                                                                                                                                                                                                                |
| $d_{\text{calc}}$                    | 1.531 g/cm <sup>3</sup>                                                                                                                                                                                          |
| $F_{000}$                            | 450                                                                                                                                                                                                              |
| $\mu(0.71073 \text{ \AA radiation})$ | 0.93 cm <sup>-1</sup>                                                                                                                                                                                            |

### B. Intensity Measurements

|                             |                                                                                           |
|-----------------------------|-------------------------------------------------------------------------------------------|
| Diffractionmeter            | Siemens SMART-APEX CCD                                                                    |
| Radiation                   | $\lambda = 0.71073 \text{ \AA}$<br>graphite monochromated                                 |
| Exposure Time               | 10 seconds per frame.                                                                     |
| Scan Type                   | $\omega$ (0.3 degrees per frame)                                                          |
| $\theta_{\text{max}}$       | 26.41°                                                                                    |
| Data Collection Temperature | 159 K                                                                                     |
| No. of Reflections Measured | Total: 6182<br>Unique: 3767 ( $R_{\text{int}} = 0.0183$ )                                 |
| Corrections                 | Lorentz-polarization<br>Absorption:<br>$T_{\text{max}} = 0.92$<br>$T_{\text{min}} = 0.84$ |

### C. Structure Solution and Refinement

|                                           |                                                                        |
|-------------------------------------------|------------------------------------------------------------------------|
| Structure Solution                        | Direct (SIR-92)                                                        |
| Refinement                                | Full-matrix least-squares (SHELXL-97)                                  |
| Function Minimized                        | $\Sigma w( F_o ^2 -  F_c ^2)^2$                                        |
| Least Squares Weighting scheme            | $w = 1/[\sigma^2(F_o^2) + (0.0292P)^2]$ where $P = (F_o^2 + 2F_c^2)/3$ |
| Anomalous Dispersion                      | All non-hydrogen atoms                                                 |
| No. Observations ( $F_o > 4\sigma(F_o)$ ) | 3031                                                                   |
| No. Variables                             | 232                                                                    |
| Reflection/Parameter Ratio                | 16.24                                                                  |
| Residuals: $R_1$ ; $wR_2$                 | 0.0268; 0.0567                                                         |
| Goodness of Fit Indicator ( $S$ )         | 0.947                                                                  |
| Max Shift/Error in Final Cycle            | 0.002                                                                  |
| Maximum peak in Final Diff. Map           | 0.57 e <sup>-</sup> /Å <sup>3</sup>                                    |
| Minimum peak in Final Diff. Map           | -0.30 e <sup>-</sup> /Å <sup>3</sup>                                   |

**Table 1a. Atomic coordinates,  $U_{\text{iso}}/U_{\text{eq}}$ , and occupancy**

| atom | $x$        | $y$        | $z$       | $U_{\text{eq}}$ | occ |
|------|------------|------------|-----------|-----------------|-----|
| Rh1  | 0.0302(1)  | 0.1029(1)  | 1.0111(1) | 0.017(1)        | 1   |
| O1   | 0.2035(2)  | 0.0663(2)  | 0.8986(2) | 0.021(1)        | 1   |
| O2   | -0.0977(2) | 0.2492(2)  | 0.8513(2) | 0.022(1)        | 1   |
| O3   | -0.1451(2) | 0.1270(2)  | 1.1238(2) | 0.022(1)        | 1   |
| O4   | 0.1523(2)  | -0.0528(2) | 1.1693(2) | 0.021(1)        | 1   |
| O5   | 0.0934(2)  | 0.2865(2)  | 1.0540(2) | 0.027(1)        | 1   |
| C1   | 0.2241(3)  | -0.0390(3) | 0.8558(2) | 0.021(1)        | 1   |
| C2   | 0.3586(3)  | -0.0605(3) | 0.7753(3) | 0.026(1)        | 1   |
| C3   | 0.4888(3)  | -0.0955(3) | 0.8600(3) | 0.033(1)        | 1   |
| C4   | 0.3737(3)  | -0.1921(3) | 0.7316(3) | 0.037(1)        | 1   |
| C5   | 0.3497(3)  | 0.0929(3)  | 0.6558(3) | 0.029(1)        | 1   |
| C6   | 0.2152(3)  | 0.1557(3)  | 0.5725(3) | 0.029(1)        | 1   |
| C7   | 0.2095(3)  | 0.1212(4)  | 0.4649(3) | 0.037(1)        | 1   |
| C8   | 0.0824(4)  | 0.1737(4)  | 0.3957(3) | 0.046(1)        | 1   |
| C9   | -0.0403(3) | 0.2654(4)  | 0.4297(3) | 0.038(1)        | 1   |
| C10  | -0.0359(3) | 0.3043(3)  | 0.5331(3) | 0.030(1)        | 1   |
| C11  | 0.0931(3)  | 0.2495(3)  | 0.6031(3) | 0.028(1)        | 1   |
| C12  | -0.1666(3) | 0.4024(3)  | 0.5751(3) | 0.032(1)        | 1   |
| C13  | -0.2577(3) | 0.3081(3)  | 0.6779(3) | 0.026(1)        | 1   |
| C14  | -0.3238(3) | 0.2244(3)  | 0.6219(3) | 0.034(1)        | 1   |
| C15  | -0.3770(3) | 0.4183(3)  | 0.7221(3) | 0.040(1)        | 1   |
| C16  | -0.1614(3) | 0.1934(3)  | 0.7960(2) | 0.020(1)        | 1   |
| C17  | 0.1655(3)  | 0.3732(3)  | 0.9987(3) | 0.030(1)        | 1   |
| C18  | 0.2072(4)  | 0.4040(4)  | 0.8613(3) | 0.052(1)        | 1   |
| C19  | 0.2157(3)  | 0.4545(4)  | 1.0648(4) | 0.048(1)        | 1   |
| H3A  | 0.4791     | -0.0118    | 0.8861    | 0.050           | 1   |
| H3B  | 0.5750     | -0.1084    | 0.8113    | 0.050           | 1   |
| H3C  | 0.4939     | -0.1881    | 0.9354    | 0.050           | 1   |
| H4A  | 0.3808     | -0.2859    | 0.8063    | 0.056           | 1   |
| H4B  | 0.4586     | -0.2028    | 0.6811    | 0.056           | 1   |
| H4C  | 0.2910     | -0.1701    | 0.6800    | 0.056           | 1   |
| H5A  | 0.3563     | 0.1697     | 0.6864    | 0.035           | 1   |
| H5B  | 0.4323     | 0.0769     | 0.6021    | 0.035           | 1   |
| H7   | 0.2914     | 0.0628     | 0.4398    | 0.045           | 1   |
| H8   | 0.0783     | 0.1478     | 0.3255    | 0.055           | 1   |
| H9   | -0.1253    | 0.3002     | 0.3821    | 0.045           | 1   |
| H11  | 0.0972     | 0.2767     | 0.6725    | 0.033           | 1   |
| H12A | -0.2270    | 0.4725     | 0.4994    | 0.038           | 1   |
| H12B | -0.1349    | 0.4635     | 0.6102    | 0.038           | 1   |
| H14A | -0.2489    | 0.1559     | 0.5943    | 0.051           | 1   |
| H14B | -0.3849    | 0.2977     | 0.5490    | 0.051           | 1   |
| H14C | -0.3794    | 0.1666     | 0.6869    | 0.051           | 1   |
| H15A | -0.4313    | 0.3606     | 0.7888    | 0.059           | 1   |
| H15B | -0.4395    | 0.4902     | 0.6498    | 0.059           | 1   |
| H15C | -0.3348    | 0.4728     | 0.7555    | 0.059           | 1   |
| H18A | 0.2684     | 0.3114     | 0.8552    | 0.078           | 1   |
| H18B | 0.2576     | 0.4817     | 0.8318    | 0.078           | 1   |
| H18C | 0.1225     | 0.4389     | 0.8083    | 0.078           | 1   |
| H19A | 0.1824     | 0.4250     | 1.1523    | 0.072           | 1   |
| H19B | 0.1783     | 0.5634     | 1.0192    | 0.072           | 1   |

H19C                      0.3188                      0.4274                      1.0655                      0.072                      1

$U_{eq}$  is defined as one third of the orthogonalized  $U_{ij}$  tensor

**Table 2a. Anisotropic Displacement Parameters**

| atom | $U_{11}$ | $U_{22}$ | $U_{33}$ | $U_{12}$  | $U_{13}$  | $U_{23}$  |
|------|----------|----------|----------|-----------|-----------|-----------|
| Rh1  | 0.017(1) | 0.016(1) | 0.020(1) | -0.008(1) | 0.000(1)  | -0.006(1) |
| O1   | 0.022(1) | 0.021(1) | 0.025(1) | -0.012(1) | 0.004(1)  | -0.007(1) |
| O2   | 0.021(1) | 0.020(1) | 0.024(1) | -0.007(1) | -0.004(1) | -0.006(1) |
| O3   | 0.020(1) | 0.024(1) | 0.027(1) | -0.014(1) | 0.004(1)  | -0.009(1) |
| O4   | 0.024(1) | 0.020(1) | 0.021(1) | -0.008(1) | -0.003(1) | -0.008(1) |
| O5   | 0.026(1) | 0.025(1) | 0.037(1) | -0.017(1) | 0.002(1)  | -0.010(1) |
| C1   | 0.018(1) | 0.025(1) | 0.017(1) | -0.006(1) | -0.001(1) | -0.004(1) |
| C2   | 0.021(2) | 0.030(1) | 0.029(2) | -0.014(1) | 0.007(1)  | -0.008(1) |
| C3   | 0.022(2) | 0.038(2) | 0.037(2) | -0.015(1) | 0.004(1)  | -0.005(1) |
| C4   | 0.036(2) | 0.039(2) | 0.046(2) | -0.027(2) | 0.016(2)  | -0.013(1) |
| C5   | 0.028(2) | 0.037(2) | 0.029(2) | -0.016(1) | 0.009(1)  | -0.017(1) |
| C6   | 0.032(2) | 0.034(2) | 0.022(2) | -0.007(1) | 0.005(1)  | -0.021(1) |
| C7   | 0.035(2) | 0.054(2) | 0.032(2) | -0.022(2) | 0.007(2)  | -0.019(2) |
| C8   | 0.057(2) | 0.070(2) | 0.021(2) | -0.020(2) | 0.005(2)  | -0.031(2) |
| C9   | 0.040(2) | 0.052(2) | 0.021(2) | -0.005(2) | -0.008(2) | -0.022(2) |
| C10  | 0.033(2) | 0.029(1) | 0.023(2) | 0.003(1)  | 0.000(1)  | -0.019(1) |
| C11  | 0.033(2) | 0.028(1) | 0.022(2) | -0.004(1) | -0.001(1) | -0.017(1) |
| C12  | 0.033(2) | 0.025(1) | 0.029(2) | 0.002(1)  | -0.012(1) | -0.011(1) |
| C13  | 0.023(2) | 0.026(1) | 0.027(2) | -0.005(1) | -0.005(1) | -0.008(1) |
| C14  | 0.032(2) | 0.038(2) | 0.030(2) | -0.004(1) | -0.009(1) | -0.017(1) |
| C15  | 0.030(2) | 0.035(2) | 0.044(2) | -0.011(2) | -0.011(2) | 0.002(1)  |
| C16  | 0.014(1) | 0.023(1) | 0.020(2) | -0.007(1) | 0.002(1)  | -0.004(1) |
| C17  | 0.021(2) | 0.020(1) | 0.048(2) | -0.015(1) | -0.006(1) | 0.001(1)  |
| C18  | 0.068(3) | 0.047(2) | 0.043(2) | -0.006(2) | 0.004(2)  | -0.037(2) |
| C19  | 0.032(2) | 0.043(2) | 0.087(3) | -0.043(2) | -0.001(2) | -0.011(2) |

The general temperature factor expression:  $\exp(-2p^2(a^{*2}U_{11}h^2 + b^{*2}U_{22}k^2 + c^{*2}U_{33}l^2 + 2a^*$

**Table 3a. Bond Lengths (Å)**

| atom | atom             | distance   | atom | atom | distance |
|------|------------------|------------|------|------|----------|
| Rh1  | O4               | 2.0286(18) | C8   | C9   | 1.396(4) |
| Rh1  | O3               | 2.0374(18) | C8   | H8   | 0.9300   |
| Rh1  | O1               | 2.0403(18) | C9   | C10  | 1.371(4) |
| Rh1  | O2               | 2.0484(18) | C9   | C10  | 1.371(4) |
| Rh1  | O5               | 2.3042(19) | C9   | H9   | 0.9300   |
| Rh1  | Rh1 <sup>1</sup> | 2.3817(9)  | C10  | C11  | 1.396(4) |
| O1   | C1               | 1.271(3)   | C10  | C12  | 1.520(4) |
| O2   | C16              | 1.274(3)   | C11  | H11  | 0.9300   |
| O3   | C1 <sup>1</sup>  | 1.263(3)   | C12  | C13  | 1.552(4) |
| O4   | C16 <sup>1</sup> | 1.261(3)   | C12  | H12A | 0.9700   |
| O5   | C17              | 1.204(3)   | C12  | H12B | 0.9700   |
| C1   | O3 <sup>1</sup>  | 1.263(3)   | C13  | C14  | 1.517(4) |
| C1   | C2               | 1.528(3)   | C13  | C16  | 1.534(3) |
| C2   | C4               | 1.529(4)   | C13  | C15  | 1.537(4) |

|    |     |          |     |                 |          |
|----|-----|----------|-----|-----------------|----------|
| C2 | C3  | 1.535(4) | C14 | H14A            | 0.9600   |
| C2 | C5  | 1.559(4) | C14 | H14B            | 0.9600   |
| C3 | H3A | 0.9600   | C14 | H14C            | 0.9600   |
| C3 | H3B | 0.9600   | C15 | H15A            | 0.9600   |
| C3 | H3C | 0.9600   | C15 | H15B            | 0.9600   |
| C4 | H4A | 0.9600   | C15 | H15C            | 0.9600   |
| C4 | H4B | 0.9600   | C16 | O4 <sup>1</sup> | 1.261(3) |
| C4 | H4C | 0.9600   | C17 | C19             | 1.489(4) |
| C5 | C6  | 1.512(4) | C17 | C18             | 1.490(4) |
| C5 | H5A | 0.9700   | C18 | H18A            | 0.9600   |
| C5 | H5B | 0.9700   | C18 | H18B            | 0.9600   |
| C6 | C11 | 1.386(4) | C18 | H18C            | 0.9600   |
| C6 | C7  | 1.392(4) | C19 | H19A            | 0.9600   |
| C7 | C8  | 1.379(4) | C19 | H19B            | 0.9600   |
| C7 | H7  | 0.9300   | C19 | H19C            | 0.9600   |

Symmetry transformations used to generate equivalent atoms: <sup>1</sup> -x,-y,-z+2

**Table 4a. Bond Angles (°)**

| atom             | atom | atom             | angle      | atom | atom | atom | angle    |
|------------------|------|------------------|------------|------|------|------|----------|
| O4               | Rh1  | O3               | 90.70(7)   | C7   | C8   | H8   | 119.6    |
| O4               | Rh1  | O1               | 88.69(7)   | C9   | C8   | H8   | 119.6    |
| O3               | Rh1  | O1               | 176.37(7)  | C10  | C9   | C8   | 120.2(3) |
| O4               | Rh1  | O2               | 176.38(6)  | C10  | C9   | H9   | 119.9    |
| O3               | Rh1  | O2               | 88.74(7)   | C8   | C9   | H9   | 119.9    |
| O1               | Rh1  | O2               | 91.64(8)   | C9   | C10  | C11  | 118.5(3) |
| O4               | Rh1  | O5               | 86.17(7)   | C9   | C10  | C12  | 122.4(3) |
| O3               | Rh1  | O5               | 88.80(7)   | C11  | C10  | C12  | 119.1(3) |
| O1               | Rh1  | O5               | 94.73(7)   | C6   | C11  | C10  | 122.1(3) |
| O2               | Rh1  | O5               | 97.39(7)   | C6   | C11  | H11  | 119.0    |
| O4               | Rh1  | Rh1 <sup>1</sup> | 88.64(5)   | C10  | C11  | H11  | 119.0    |
| O3               | Rh1  | Rh1 <sup>1</sup> | 89.00(5)   | C10  | C12  | C13  | 113.8(2) |
| O1               | Rh1  | Rh1 <sup>1</sup> | 87.41(5)   | C10  | C12  | H12A | 108.8    |
| O2               | Rh1  | Rh1 <sup>1</sup> | 87.78(5)   | C13  | C12  | H12A | 108.8    |
| O5               | Rh1  | Rh1 <sup>1</sup> | 174.34(5)  | C10  | C12  | H12B | 108.8    |
| C1               | O1   | Rh1              | 119.65(16) | C13  | C12  | H12B | 108.8    |
| C16              | O2   | Rh1              | 118.84(15) | H12A | C12  | H12B | 107.7    |
| C1 <sup>1</sup>  | O3   | Rh1              | 118.28(16) | C14  | C13  | C16  | 110.5(2) |
| C16 <sup>1</sup> | O4   | Rh1              | 119.21(16) | C14  | C13  | C15  | 109.8(2) |
| C17              | O5   | Rh1              | 133.7(2)   | C16  | C13  | C15  | 108.1(2) |
| O3 <sup>1</sup>  | C1   | O1               | 125.7(2)   | C14  | C13  | C12  | 110.7(2) |
| O3 <sup>1</sup>  | C1   | C2               | 118.4(2)   | C16  | C13  | C12  | 108.9(2) |
| O1               | C1   | C2               | 115.9(2)   | C15  | C13  | C12  | 108.8(2) |
| C1               | C2   | C4               | 111.2(2)   | C13  | C14  | H14A | 109.5    |
| C1               | C2   | C3               | 107.7(2)   | C13  | C14  | H14B | 109.5    |
| C4               | C2   | C3               | 110.0(2)   | H14A | C14  | H14B | 109.5    |
| C1               | C2   | C5               | 108.7(2)   | C13  | C14  | H14C | 109.5    |
| C4               | C2   | C5               | 110.6(2)   | H14A | C14  | H14C | 109.5    |
| C3               | C2   | C5               | 108.6(2)   | H14B | C14  | H14C | 109.5    |
| C2               | C3   | H3A              | 109.5      | C13  | C15  | H15A | 109.5    |
| C2               | C3   | H3B              | 109.5      | C13  | C15  | H15B | 109.5    |
| H3A              | C3   | H3B              | 109.5      | H15A | C15  | H15B | 109.5    |

|     |    |     |          |                 |     |      |          |
|-----|----|-----|----------|-----------------|-----|------|----------|
| C2  | C3 | H3C | 109.5    | C13             | C15 | H15C | 109.5    |
| H3A | C3 | H3C | 109.5    | H15A            | C15 | H15C | 109.5    |
| H3B | C3 | H3C | 109.5    | H15B            | C15 | H15C | 109.5    |
| C2  | C4 | H4A | 109.5    | O4 <sup>1</sup> | C16 | O2   | 125.5(2) |
| C2  | C4 | H4B | 109.5    | O4 <sup>1</sup> | C16 | C13  | 117.7(2) |
| H4A | C4 | H4B | 109.5    | O2              | C16 | C13  | 116.8(2) |
| C2  | C4 | H4C | 109.5    | O5              | C17 | C19  | 121.2(3) |
| H4A | C4 | H4C | 109.5    | O5              | C17 | C18  | 121.4(3) |
| H4B | C4 | H4C | 109.5    | C19             | C17 | C18  | 117.4(3) |
| C6  | C5 | C2  | 115.2(2) | C17             | C18 | H18A | 109.5    |
| C6  | C5 | H5A | 108.5    | C17             | C18 | H18B | 109.5    |
| C2  | C5 | H5A | 108.5    | H18A            | C18 | H18B | 109.5    |
| C6  | C5 | H5B | 108.5    | C17             | C18 | H18C | 109.5    |
| C2  | C5 | H5B | 108.5    | H18A            | C18 | H18C | 109.5    |
| H5A | C5 | H5B | 107.5    | H18B            | C18 | H18C | 109.5    |
| C11 | C6 | C7  | 118.4(3) | C17             | C19 | H19A | 109.5    |
| C11 | C6 | C5  | 119.9(3) | C17             | C19 | H19B | 109.5    |
| C7  | C6 | C5  | 121.7(3) | H19A            | C19 | H19B | 109.5    |
| C8  | C7 | C6  | 119.9(3) | C17             | C19 | H19C | 109.5    |
| C8  | C7 | H7  | 120.0    | H19A            | C19 | H19C | 109.5    |
| C6  | C7 | H7  | 120.0    | H19B            | C19 | H19C | 109.5    |
| C7  | C8 | C9  | 120.8(3) |                 |     |      |          |

Symmetry transformations used to generate equivalent atoms: <sup>1</sup> -x,-y,-z+2

**Table 5a. Torsion Angles (°)**

| atom             | atom | atom | atom             | angle       | atom             | atom | atom | atom             | angle       |
|------------------|------|------|------------------|-------------|------------------|------|------|------------------|-------------|
| O4               | Rh1  | O1   | C1               | 89.08(18)   | O3               | Rh1  | O1   | C1               | 8.6(13)     |
| O2               | Rh1  | O1   | C1               | -87.31(18)  | O5               | Rh1  | O1   | C1               | 175.13(18)  |
| Rh1 <sup>1</sup> | Rh1  | O1   | C1               | 0.39(17)    | O4               | Rh1  | O2   | C16              | -8.1(12)    |
| O3               | Rh1  | O2   | C16              | -89.28(17)  | O1               | Rh1  | O2   | C16              | 87.11(17)   |
| O5               | Rh1  | O2   | C16              | -177.91(17) | Rh1 <sup>1</sup> | Rh1  | O2   | C16              | -0.23(17)   |
| O4               | Rh1  | O3   | C1 <sup>1</sup>  | -89.46(18)  | O1               | Rh1  | O3   | C1 <sup>1</sup>  | -9.0(13)    |
| O2               | Rh1  | O3   | C1 <sup>1</sup>  | 86.96(18)   | O5               | Rh1  | O3   | C1 <sup>1</sup>  | -175.62(18) |
| Rh1 <sup>1</sup> | Rh1  | O3   | C1 <sup>1</sup>  | -0.84(17)   | O3               | Rh1  | O4   | C16 <sup>1</sup> | 89.93(18)   |
| O1               | Rh1  | O4   | C16 <sup>1</sup> | -86.49(18)  | O2               | Rh1  | O4   | C16 <sup>1</sup> | 8.8(12)     |
| O5               | Rh1  | O4   | C16 <sup>1</sup> | 178.67(18)  | Rh1 <sup>1</sup> | Rh1  | O4   | C16 <sup>1</sup> | 0.94(17)    |
| O4               | Rh1  | O5   | C17              | 112.7(2)    | O3               | Rh1  | O5   | C17              | -156.5(2)   |
| O1               | Rh1  | O5   | C17              | 24.4(3)     | O2               | Rh1  | O5   | C17              | -67.9(3)    |
| Rh1 <sup>1</sup> | Rh1  | O5   | C17              | 136.4(4)    | Rh1              | O1   | C1   | O3 <sup>1</sup>  | 0.2(3)      |
| Rh1              | O1   | C1   | C2               | -178.53(16) | O3 <sup>1</sup>  | C1   | C2   | C4               | 0.0(3)      |
| O1               | C1   | C2   | C4               | 178.8(2)    | O3 <sup>1</sup>  | C1   | C2   | C3               | -120.6(3)   |
| O1               | C1   | C2   | C3               | 58.2(3)     | O3 <sup>1</sup>  | C1   | C2   | C5               | 122.0(2)    |
| O1               | C1   | C2   | C5               | -59.2(3)    | C1               | C2   | C5   | C6               | -54.8(3)    |
| C4               | C2   | C5   | C6               | 67.6(3)     | C3               | C2   | C5   | C6               | -171.6(2)   |
| C2               | C5   | C6   | C11              | 86.7(3)     | C2               | C5   | C6   | C7               | -92.9(3)    |
| C11              | C6   | C7   | C8               | -3.2(4)     | C5               | C6   | C7   | C8               | 176.4(3)    |
| C6               | C7   | C8   | C9               | 1.9(5)      | C7               | C8   | C9   | C10              | -0.1(5)     |
| C8               | C9   | C10  | C11              | -0.4(4)     | C8               | C9   | C10  | C12              | -179.4(2)   |
| C7               | C6   | C11  | C10              | 2.8(4)      | C5               | C6   | C11  | C10              | -176.8(2)   |
| C9               | C10  | C11  | C6               | -1.0(4)     | C12              | C10  | C11  | C6               | 178.0(2)    |
| C9               | C10  | C12  | C13              | 91.0(3)     | C11              | C10  | C12  | C13              | -88.0(3)    |

|     |     |     |                 |            |     |     |     |                 |             |
|-----|-----|-----|-----------------|------------|-----|-----|-----|-----------------|-------------|
| C10 | C12 | C13 | C14             | -64.9(3)   | C10 | C12 | C13 | C16             | 56.8(3)     |
| C10 | C12 | C13 | C15             | 174.4(2)   | Rh1 | O2  | C16 | O4 <sup>1</sup> | -0.5(3)     |
| Rh1 | O2  | C16 | C13             | 179.11(16) | C14 | C13 | C16 | O4 <sup>1</sup> | -1.3(3)     |
| C15 | C13 | C16 | O4 <sup>1</sup> | 118.9(2)   | C12 | C13 | C16 | O4 <sup>1</sup> | -123.0(2)   |
| C14 | C13 | C16 | O2              | 179.1(2)   | C15 | C13 | C16 | O2              | -60.7(3)    |
| C12 | C13 | C16 | O2              | 57.3(3)    | Rh1 | O5  | C17 | C19             | -165.48(19) |
| Rh1 | O5  | C17 | C18             | 14.8(4)    |     |     |     |                 |             |

Symmetry transformations used to generate equivalent atoms: <sup>1</sup> -x,-y,-z+2
